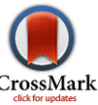

## Correction

# Correction: Is "Huh?" a Universal Word? Conversational Infrastructure and the Convergent Evolution of Linguistic Items

The *PLOS ONE* Staff

### Notice of Republication

There were numerous errors throughout the article introduced during production, regarding the linguistic symbols. The article was republished on March 17, 2014. Please download the article again to view the correct version. The publisher apologizes for these errors.

### Supporting Information

**File S1.** Originally published, uncorrected article.

**File S2.** Republished corrected article.

### Reference

1. Dingemanse M, Torreira F, Enfield NJ (2013) Is "Huh?" a Universal Word? Conversational Infrastructure and the Convergent Evolution of Linguistic Items. *PLoS ONE* 8(11): e78273. doi:10.1371/journal.pone.0078273

**Citation:** The *PLOS ONE* Staff (2014) Correction: Is "Huh?" a Universal Word? Conversational Infrastructure and the Convergent Evolution of Linguistic Items. *PLoS ONE* 9(4): e94620. doi:10.1371/journal.pone.0094620

**Published:** April 2, 2014

**Copyright:** © 2014 The *PLOS ONE* Staff. This is an open-access article distributed under the terms of the Creative Commons Attribution License, which permits unrestricted use, distribution, and reproduction in any medium, provided the original author and source are credited.
